# Supplementary material for: One-step photodeposition of spatially separated CuOxand MnOxdual cocatalysts on g-C3N4for enhanced CO2photoreduction
Source: Royal Society of Chemistry journal article supplement (doi:10.1039/d3dt01522j), 2023-01-01
Supplement: d3dt01522j1.pdf [file d3dt01522j1.pdf]

# One-step photodeposition of spatially separated CuO<sub>x</sub> and MnO<sub>x</sub> dual cocatalysts on g-C<sub>3</sub>N<sub>4</sub> for enhanced CO<sub>2</sub> photoreduction

Fengyu Tian<sup>\*a</sup>, Xinyao Wu<sup>a</sup>, Junhong Chen<sup>b</sup>, Xuebiao Sun<sup>b</sup>, Xuemin Yan<sup>\*a</sup>, Guangfu  
Liao<sup>\*cd</sup>

<sup>a</sup> College of Chemistry and Environmental Engineering, Yangtze University, Jingzhou, Hubei 434023, China.

<sup>b</sup> No. 3 Oil Production Plant, PetroChina Changqing Oilfield Company, Yinchuan, Ningxia 750006, China

<sup>c</sup> College of Material Engineering, Fujian Agriculture and Forestry University, Fuzhou 350002, China.

<sup>d</sup> School of Chemistry and Chemical Engineering/State Key Laboratory Incubation Base for Green Processing of  
Chemical Engineering, Shihezi University, Shihezi 832003, China.

Corresponding authors:

[tfengyu@126.com](mailto:tfengyu@126.com) (F. Tian)

[xueminyan@126.com](mailto:xueminyan@126.com) (X. Yan)

[liaogf@mail2.sysu.edu.cn](mailto:liaogf@mail2.sysu.edu.cn) (G. Liao)

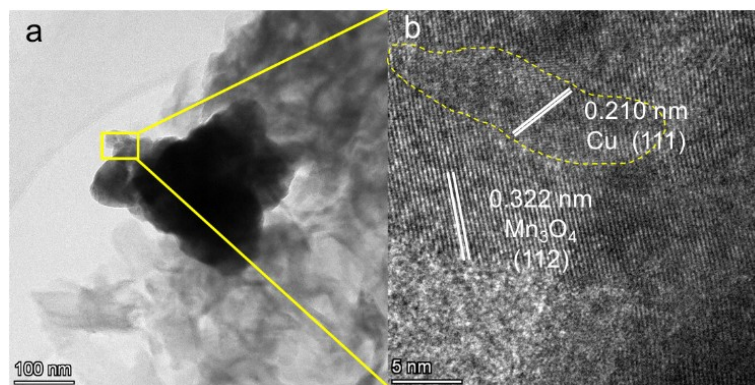

**Figure S1.** (a) TEM and (b) HRTEM images of Cu/MnCN.

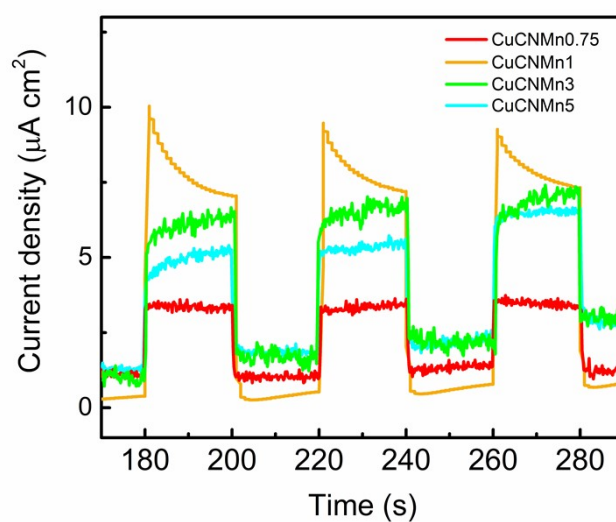

**Figure S2.** Photocurrent curves of all the  $\text{CuO}_x/\text{g-C}_3\text{N}_4/\text{MnO}_x$  composites.

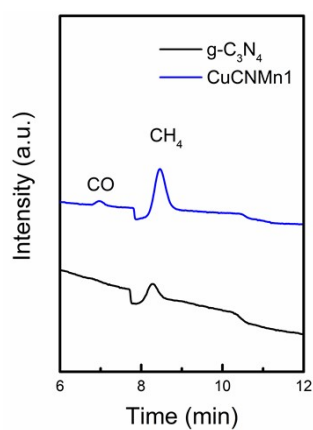

**Figure S3.** Gas chromatograms spectra for the gaseous products of the photocatalytic  $\text{CO}_2$  reduction over  $\text{g-C}_3\text{N}_4$  and CuCNMn after 4 h light irradiation.

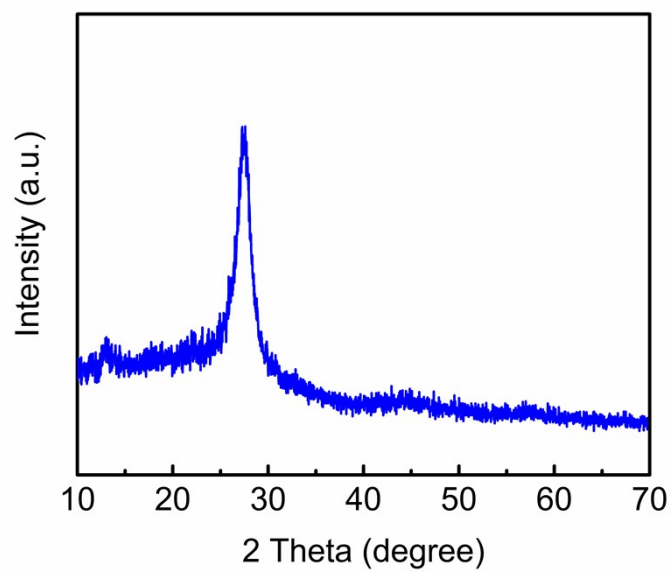

**Figure S4.** XRD pattern of the used CuCNMn1 sample.

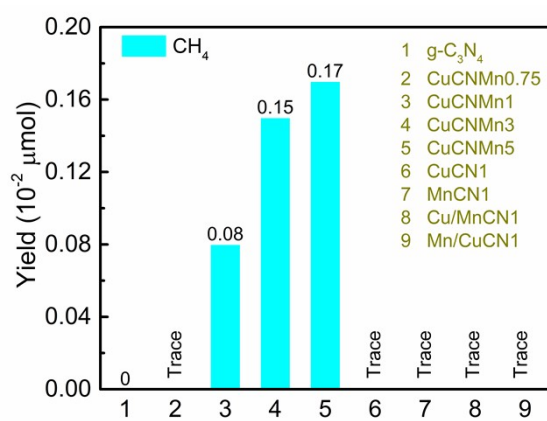

**Figure S5.** Photocatalytic CO<sub>2</sub> reduction to CH<sub>4</sub> over different samples.
